# Supplementary material
Source: Springer Nature journal article supplement (https://www.springermedizin.de/resource/supplementary/12916_2012_793_MOESM3_ESM.pdf/9598312)

Lumen

Cell

Peritubular space

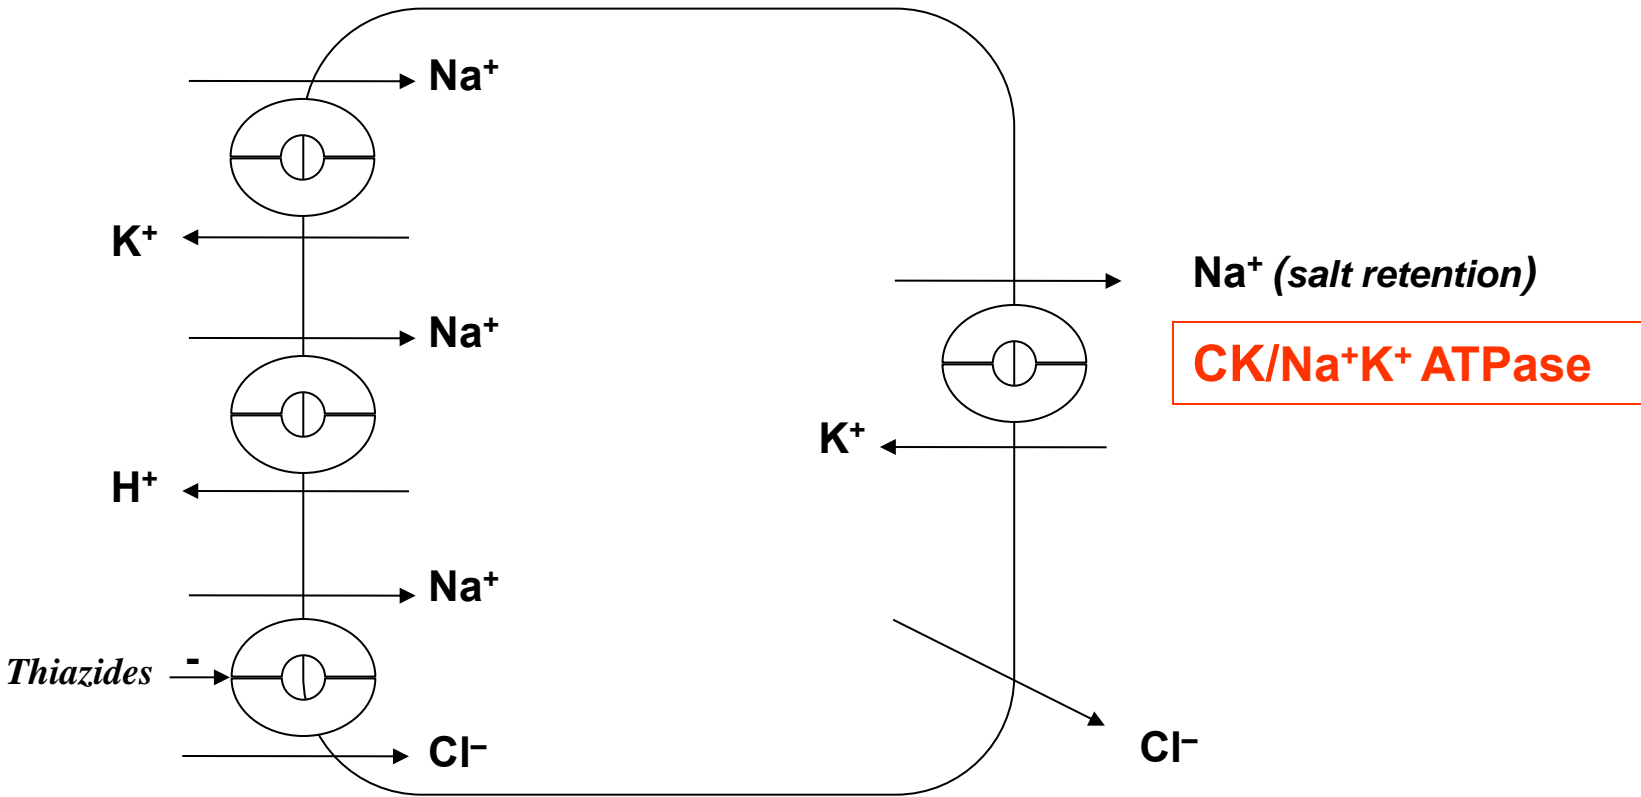

Distal tubule

Supplement: MOESM3 [file 9598312]
